# Supplementary material for: Risk factors associated with nosocomial infections among end stage renal disease patients undergoing hemodialysis: A systematic review
Source: PLoS One. 2020 Jun 22;15(6):e0234376. doi: 10.1371/journal.pone.0234376 (PMC7307739; doi:10.1371/journal.pone.0234376)
Supplement: S1 Data — (XLSX) [file pone.0234376.s001.xlsx]

## Sheet: Overall Charactersitics
S. No	Author	Year	Title	Study country	Study design	Year of study	Duration of study	Respondents	Inclusion criteria	Exclusion criteria	Statistic analysis used	Sample	Drop out	Tool Used	Type of infections studied	Type of microorganisms	Risk factors	Percentages of nosocomial infections	Rates of infection per type of vascular access
No. 1	Erika M.C. D’Agata, David B. Mount, Valerie Thayer, and William Schaffner	2000	Hospital-Acquired Infections Among Chronic Hemodialysis Patients	Nashville, TN, America	Case Control study	July 1, 1995 - December 31, 1997	30 months	Case group : ESRD patients undergoing hemodialysis with nosocomial infection Control group : ESRD patients on hemodialysis without nosocomial infections	ESRD patients on HD	Patients under the age of 18 were not included, Patients on peritoneal dialysis were also exluded.	Chi-square or Fischer’s exact test, T-test or Wilcoxon’s rank-sum test for nonparametric distributions, Conditional logistic regression (Stata 6.0)	365 Patients for overall study 58 patients for Case-control study	0	Data collection forms to retrieve demographic and clinical data from hospital medical records	Pneumonia, Primary bloodstream infections (BSIs), Urinary Tract Infections (UTIs), and Diarrhea caused by Clostridium diffıcile (CD)	Enterococcus spp 6 (13%), Candida spp 8 (17%) , Enterobacter spp 6 (13%), Pseudomonas aeruginosa 5 (10%), Staphylococcus aureus 3 (6%), Escherichia coli 3 (6%), Coagulase-negative staphylococci 1 (2%)	Nil - There were no differences in patient demographic characteristics, presence of diabetes mellitus, or an immunocompromised state in both the groups. (P-value more than 0.05)	Total 47 (100%) -- Urinary tract infection 22 (47%), Urinary tract infection 22 (47%), Pneumonia 9 (19%), Clostridium difficile diarrhea 3 (6%)	Of the 13 BSIs among chronic hemodialysis patients, 1 BSI was associated with an arteriovenous fistula infection and 4 BSIs were associated with temporary central catheter infections.
No. 2	Matías Gnass MD, Caren Gielish LVN, Silvia Acosta-Gnass MSc	2014	Incidence of nosocomial hemodialysis-associated bloodstream infections at a county teaching hospital	Moreno Valley, California, America	Cross sectional study	January 2011 to December 2012	24 months	Patient on Hemodilaysis	All Hospitalized patients who underwent hemodialysis	refusal to participate, intercurrent illness, psychiatric disease, or language barrier.	Categorical variables were compared using Chi square test or Fischer exact test, continuous variables were studied using logistic regression. (IBM SPSS statistics (SPSS Inc, Chicago, IL)).	619	0	Data collection forms to retrieve demographic and clinical data from hospital medical records and laboratory records	Hemodialysis associated blood stream infections (HABSI)	Total 14 isolated microorganisms -- 9 (64%) were gram positive cocci with a predominance of 8 staphylococcal infections (57%). Within this group of staphylococci, Staphylococcus aureus was the main microorganism isolated (63%). Candida spp 3 (21%).	A positive correlation was detected between HABSI and length of hospital stay (r ¼ 0.82; 95% CI: 0.79-0.83, P <.05), number of hemodialysis sessions (r ¼ 0.56; 95% CI: 0.52-0.61, P < .05), for patients with diabetes, between HABSI and HbA1c level (r ¼ 0.49; 95% CI: 0.42-0.55, P <.05). Risk for a hemodialysis-associated event significantly increased with HbA1c levels greater than 7% (OR, 3.62; 95%…	HABSI 14 (100%)	1) Fistulas, 0.9 per 1,000 hemodialysis sessions and 0.33 per 1,000 patient-days of hospitalization 2) Grafts, 13.51 per 1,000 hemodialysis sessions and 5.28 per 1,000 patient-days of hospitalization 3) Tunneled catheters, 2.39 per 1,000 hemodialysis sessions and 0.79 per 1,000 patient-days of hospitalization 4) Nontunneled catheters, 5.5 per 1,000 hemodialysis sessions and 1.36 per 1,000 patient…
No.3	LUYU TANG, JUNGUO CHEN	2016	ECONOMIC IMPACT OF NOSOCOMIAL INFECTION IN HEMODIALYSIS PATIENTS	China	Cross sectional study - Retrospective and prospective	January 2012 to December 2014	36 months	Patient on Hemodilaysis	All Hospitalized patients who underwent hemodialysis	Patients below the age of 12	The univariate analysis used the t-test and chi-square test, and multivariate analysis used logistic regression analysis. (SPSS 18)	890	0	Data collection forms to retrieve demographic and clinical data from hospital medical records and laboratory records	All nosocomial infectons	Total 98 (100%) -- Gram negative bacilli - 47 (47.94%), Gram positive bacilli - 44 (44.9) , Fungi - 7 (7.14%)	Logistic regression analysis showed that, young and the old patients with multiple comorbidities, long duration of dialysis, more catheter sites (two or more), low hemoglobin concentration, low white blood cell counts, and long duration of catheterization were identified as risk factors for nosocomial infection	Total 110 (100%) -- including 43 (39%) cases of lower respiratory tract infection, 23 (20.9%) cases of upper respiratory tract infection, 19 (17.27%) cases of catheter-related infection, 13 (11.81%) cases of urinary tract infection, 4 (3.6%) cases of gastrointestinal infection, and 8 (7.27%) cases of infection in other organ systems.	N/A
No.4	Jae-Uk Song, Hye Kyeong Park, Hyung Koo Kang and Jonghoo Lee	2017	Proposed risk factors for infection with multidrug-resistant pathogens in hemodialysis patients hospitalized with pneumonia	South korea	Retrospective observational cohort study	January 2011 and December 2015	60 months	Patient on Hemodilaysis	Patients on regular intermittent HD 3 times a week were included in the analysis	(1) Those who did not receive dialysis at the time of admission, (2) Those who underwent continuous renal replacement therapy after organ failure developed by pneumonia, (3) Those who had hospital-acquired pneumonia (HAP) developed at least 48 h after hospital admission, (4) those who did receive continuous ambulatory peritoneal dialysis, (5) Those who re-visited within 10 days of discharging, an…	To identify independent predictive factors associated with occurrence of MDR pathogens, we performed multivariate logistic regression analyses, as measured by the estimated odds ratio (OR) with 95% confidence interval (CI). Potential candidate variables with a P value less than 0.05 in univariate analysis were en tered into the regression model	105	0	Data collection forms to retrieve demographic and clinical data from hospital medical records and laboratory records	Hemodialysis associated pneumonia (HDAP)	Of the total 105 HDAP patients, the responsible pathogens were determined only in 53 patients (50.4%). The most common pathogen was S. aureus (17, 16.1%), which consisted of methicillin-sensitive S. aureus (7, 6.6%) and MRSA (10, 9.5%), followed by K. pneumoniae (11, 10.4%) and S. pneumoniae (10, 9.5%).	PSI score > 147 and recent hospitalization were considered as predictive MDR risk factors.	HDAP (100%)	N/A
No. 5	Geoffrey Taylor, Denise Gravel, Lynn Johnston, John Embil, Donna Holton, Shirley Paton.	2003	Incidence of bloodstream infection in multicenter inception cohorts of hemodialysis patients	Canada	Prospective Longitudinal study - 1) Cohort study, 2) Case control study	December 1998 to May 1999	6 months	Patients on hemodialysis	Group 1: All new patients on hemodialysis Group 2: Hemodilaysis with a new vascular access		Cox proportional hazards model was used to evaluate the association between variables and risk of infection. For the nested case-control study, factors identified as potentially associated with infection in univariate analysis were included in a stepwise multivariate logistic regression model (PC SAS (Version 8.1, SAS Institute; Cary, NC))	Cohort study - 527, Case control 186	0	Data collection forms to retrieve demographic and clinical data from hospital medical records and laboratory records	Blood stream infection (BSI)	The microbial etiology of these infections were coagulase-negative staphylococci 45%, S aureus 28.1%, Enterococcus 8.8%, aerobic gram negative bacilli 8.6%, other 8.8%.	Univariable analysis identified patient hygiene (OR, 2.4) and contiguous infection at the access site (OR, 2.8) as independently associated with bloodstream infection. In the multivariable logistic regression model, prior bloodstream infection (OR, 6.56; P = .004), poor patient hygiene (OR, 3.48; P =.001), and contiguous infection (OR, 4.36; P = .002) were all independently associated with occurr…	Hemodialysis associated bloodstream infections (HABSI) - 100%	Access-specific infection rates per 10,000 procedures were 40.26 for uncuffed and 45.26 for cuffed CVC, 7.97 for arteriovenous grafts, and 5.02 for arteriovenous fistula.
No. 6	Ping-huai Wang and Hao-chien Wang	2016	Risk factors to predict drug-resistant pathogens in hemodialysis-associated pneumonia	Taiwan	Retrospective observational study	January 2005 to December 2010	72 months	Patients with healthcare associated pneumonia	They were enrolled if they fulfilled the criteria for HCAP	The patients who had been transferred in from other hospitals were excluded as their hospital course could not be sure	Continuous data were compared using the Student’s t-test, and categorical data including demographics, outcomes, antibiotics and microbiology were compared using chi-square distribution (Mann-Whitney test). Multivariate analysis of risk factors was used by general linear model. Comparisons of the clinical characteristics of PSI groups were performed using ANOVA. Significance was taken as p < 0.05.	530 (48 HD, 482 Non HD)	0	Data collection forms to retrieve demographic and clinical data from hospital medical records and laboratory records	Healthcare associated pneumonia (HCAP)	Total 48 HCAP in HD pts (100%) - β-Streptococcus n(%) 2(4.2) K. pneumoniae n(%) 2(4.2) E. coli n(%) 3(6.3) E. cloacae n(%) 3(6.3) S. marcescens n(%) 2(4.2) Causative pathogens resistant to CAP antibiotics regimen MRSA n(%) 5(10.4) P. aeruginosa n(%) 8(16.7) A. baumannii n(%) 2(4.2) S. maltophila n(%) 1(2.1) Citrobacter species n(%) 2(4.2)	The significant risk factors to predict DRPs in the patients with HDAP were wound care, old age (more than 70 years) and PSI V.	HDAP (100%)	N/A
No. 7	Cokorda Agung Wahyu Purnamasidhi, I Ketut Mariadi, I Dewa Nyoman Wibawa, Yenny Kandarini	2016	High Incidence of Hepatitis B Virus Infection in Hemodialysis Patients at Sanglah General Hospital and Its Risk Factors	Indonesia	Cross sectional study	March to June 2016	4 months	Patients on hemodialysis	All Hospitalized patients who underwent hemodialysis		A Chi-square test was used to compare frequencies between groups. A t-test was used to compare means between groups for data with normal distribution or Mann–Whitney test for non-parametric data.	267	0	Data collection forms to retrieve demographic and clinical data from hospital medical records and laboratory records	Hepatitis B infection	Hepatitis B virus	Only duration of dialysis (p < 0.01; OR: 1.07; 95% CI: 1.03-3.74) and history of previous transfusion (p < 0.01; OR: 2.49; 95% CI: 1.29-8.18) were signi􀂿cantly different between patients who sero-converted and those who remained sero-negative.	Hep B infection (100%)	N/A
No. 8	Hussein Yousif Abdullah Sinjari and Krdar Abdulkhaleq Bakr	2018	Prevalence and Risk Factors of Hepatitis B and C Virus Infections Among Patients Undergoing Hemodialysis in Kurdistan, Iraq	Iraq	Cross sectional study	10 August 2015 to 11 February 2016	6 months	Patients on hemodialysis	All Hospitalized patients who underwent hemodialysis	Those who had no interest to participate in the study or were difficult to trace were excluded	Statistical analysis was performed with SPSS version 16 (SPSS Inc, Chicago, IL, USA). Chi-square was used to compare the differences between various categorical data frequencies and the Student t test was used to compare the differences between continuous numerical data. P value 0.05 was considered statistically significant	510	0	Data collection forms to retrieve demographic and clinical data from hospital medical records and laboratory records. Blood sampling	Hepatitis B and C infection	Hepatitis B and C infection	There was a significant relationship between HBsAg positivity and age (P < 0.04), since the infection is more common in relatively younger individuals (mean age: 39.2 14.6 years). HBV acquisition was directly related to the history of HD (P = 0.005), and inversely related to hepatitis B vaccination; vaccination against hepatitis B was a strong protective factor (P < 0.001) The study revealed a si…	Hep B and C infection	N/A
No. 9	Komal Patel, Gaurishankar Shrimali	2015	Prevalence, SeroconversionAnd Risk Factors Of Hepatitis B And C Infection In Haemodialysis Patients At District Hospital Of Mehsana	Mehsana, Gujarat, India	Prospective Longitudinal study	June 2014 to October 2015	15 months	Patients on maintenance hemodialysis	The patients who were on hemodialysis for a minimum period of 1 month and were likely to be available for follow-up for at least 6 months were included in the study.	The patients who had acute renal failure were not included in the study		170	20	Testing for Hepatitis B surface antigen (HBsAg) and anti-HCV antibodies was performed at initiation of dialysis and every 3 monthly thereafter	Hepatitis B and C infection	Hepatitis B and C infection	A positive history of blood transfusions as well as the number of blood transfusions was strongly associated with HBV or HCV infection in our study. On the other hand, the prevalence and incidence of HBV or HCVsero-positivity was significantly related to the length of time on HD. Mean values for Alanine Aminotransferase and Aspartate Aminotransferase were higher in seropositive patients despite b…	Hep B and C infection	N/A

## Sheet: Participants Characteristics
S.NO	Author	Year	Title	study country	year of study	Respondents	nationality	Sample	Male; n (%)	Female; n (%)	Age	Type of dialysis
No. 1	Erika M.C. D’Agata, David B. Mount, Valerie Thayer, and William Schaffner,	2000	Hospital-Acquired Infections Among Chronic Hemodialysis Patients	Nashville, TN, America	July 1, 1995 - December 31, 1997	Case group : ESRD patients undergoing hemodialysis with nosocomial infection Control group : ESRD patients on hemodialysis without nosocomial infections	American	58 (Case: 29, Control: 29)	0.52	0.48	Mean age 55 (SD=8) years	HD
No. 2	Matías Gnass MD, Caren Gielish LVN, Silvia Acosta-Gnass MSc	2014	Incidence of nosocomial hemodialysis-associated bloodstream infections at a county teaching hospital	Moreno Valley, California, America	January 2011 to December 2012	Patient on Hemodilaysis	American	619	0.54	0.46	Mean age 57 (SD=15) years	HD
No.3	Hui, D. S., Wong, T. Y., Li, T. S., Ko, F. W., Choy, D. K., Szeto, C. C., . . . Li, P. K.	2016	ECONOMIC IMPACT OF NOSOCOMIAL INFECTION IN HEMODIALYSIS PATIENTS	China	January 2012 to December 2014	Patient on Hemodilaysis	Chinese	890	588/890	302/890	12 years - 90 years	HD
No.4	Jae-Uk Song, Hye Kyeong Park, Hyung Koo Kang and Jonghoo Lee	2017	Proposed risk factors for infection with multidrug-resistant pathogens in hemodialysis patients hospitalized with pneumonia	South korea	January 2011 and December 2015	Patient on Hemodilaysis	South korean	105	68/105	37/105	Median age - 71 years	HD
No.5	Geoffrey Taylor, Denise Gravel, Lynn Johnston, John Embil, Donna Holton, Shirley Paton.	2003	Incidence of bloodstream infection in multicenter inception cohorts of hemodialysis patients	Canada	December 1998 to May 1999	Patients on hemodialysis	Canadian	Cohort study - 527, Case control 186
No. 6											The HD group was significantly younger than the non-HD group (68.3 ± 11.3 vs. 75.8 ± 12.8 years, p = 0.001)
No. 7									0.577	0.423	Participant mean age was 54.07 ± 0.80 years with median age of adult HD patients included was 54 years (range 20–86 years)
No. 8									254 (49.8%)	256 (50.2%)	48 (SD 12) years
									85 (56.66%)	65 (43.33%)
